# Supplementary material for: Cas9/gRNA-Mediated Mutations in PtrFLA40 and PtrFLA45 Reveal Redundant Roles in Modulating Wood Cell Size and SCW Synthesis in Poplar
Source: MDPI journal article supplement (doi:10.3390/ijms24010427), 2022-12-27
Supplement: s1 [file s1]

Table S3. All primers used in this study.

| Usage                                              | Primer Name               | Sequence (5'-3')                                   |
|----------------------------------------------------|---------------------------|----------------------------------------------------|
| Primers for CRISPR/Cas9 vectors construction       |                           |                                                    |
| Cas9/gRNA-PtrFLA40                                 | DT1-BsF/ PtrFLA40         | ATATATGGTCTCGATT <u>GATATATGTAGGGTTGTGTC</u> GTT   |
|                                                    | DT1-F0/ PtrFLA40          | <u>TGATATATGTAGGGTTGTGTC</u> GTTTTAGAGCTAGAAATAGC  |
|                                                    | DT2-R0/ PtrFLA40          | AACAAGACGAAAACCGCTTATTCAATCTCTTAGTCGACTCTAC        |
|                                                    | DT2-BsR/ PtrFLA40         | ATTATTGGTCTCTAAACAAGACGAAAACCGCTTATTC              |
| Cas9/gRNA-PtrFLA45                                 | DT1-BsF/ PtrFLA45         | ATATATGGTCTCGATTGTCACAAAGTTATACAAACTGTT            |
|                                                    | DT1-F0/ PtrFLA45          | <u>TGTCACAAAGTTATACAAACT</u> GTTTTAGAGCTAGAAATAGC  |
|                                                    | DT2-R0/ PtrFLA45          | AACTGGTTTAAACCATCTTTGCACAATCTCTTAGTCGACTCTAC       |
|                                                    | DT2-BsR/ PtrFLA45         | ATTATTGGTCTCTAAACTGGTTTAAACCATCTTTGCAC             |
| Cas9/gRNA-PtrFLA40FLA45                            | DT1-BsF/<br>PtrFLA40FLA45 | ATATATGGTCTCGATTGCGCTAAATGACTCAAGCCCCGTT           |
|                                                    | DT1-F0/<br>PtrFLA40FLA45  | <u>TGCGCTAAATGACTCAAGCCCC</u> GTTTTAGAGCTAGAAATAGC |
|                                                    | DT2-R0/<br>PtrFLA40FLA45  | AACTTGTCCTCAATACCTTTGCCCAATCTCTTAGTCGACTCTAC       |
|                                                    | DT2-BsR/<br>PtrFLA40FLA45 | ATTATTGGTCTCTAAACTTGTCCTCAATACCTTTGCC              |
| Primers used to identify Cas9-gRNAs targeted sites |                           |                                                    |
| gPtrFLA40-identify                                 | Identify PtrAP40-F        | TAACTTGATCCTCTGCTCACAAC                            |
|                                                    | Identify PtrAP40-R        | GTCTGTGTATACGGTGCCAGAT                             |
| gPtrFLA45-identify                                 | Identify PtrAP45-F        | TATTGCACCTAACTATATAACCTC                           |
|                                                    | Identify PtrAP45-R        | GGCTAGTTGGTTGTCTGTGTATA                            |
| Primers used to identify transgenic plants         |                           |                                                    |

Note: Underlined letters come from PAM.

|                                                |            |                         |
|------------------------------------------------|------------|-------------------------|
| zCas                                           | zCas-F     | TGAGAACATCGTCATTGAGATGG |
|                                                | zCas-R     | CAGCTTGTCATTCTCATCGTACT |
| Hyg                                            | Hyg-F      | GAGCTTGTCGATCGACAGAT    |
|                                                | Hyg-R      | CATATGCGCGATTGCTGATC    |
| M13                                            | M13F       | TGTA AACGACGGCCAGT      |
|                                                | M13R       | CAGGAAACAGCTATGACC      |
| Primers of PtrFLAs used for RT-qPCR and RT-PCR |            |                         |
| <i>PtrFLA2/Potri.001G320800</i>                | PtrFLA2-F  | GGCTGGCCACTTCAAGACCT    |
|                                                | PtrFLA2-R  | GCAGGTGCCGGTGGTGGAGG    |
| <i>PtrFLA5/Potri.002G223300</i>                | PtrFLA5-F  | CCTAACTCAAGACCAGGTGAA   |
|                                                | PtrFLA5-R  | CCTGGAGCGCTCCCATCTCC    |
| <i>PtrFLA6/Potri.004G210600</i>                | PtrFLA6-F  | GGCTGGCCACTTCACTGTC     |
|                                                | PtrFLA6-R  | ATCAGTGTATACGGTGCCGG    |
| <i>PtrFLA8/Potri.006G129200</i>                | PtrFLA8-F  | GCACCACCTGACAACGCCTT    |
|                                                | PtrFLA8-R  | GGTGCTGGTGCTGCCGCTGT    |
| <i>PtrFLA13/Potri.009G012100</i>               | PtrFLA13-F | CTGGCTCCTCTTCCTCCATG    |
|                                                | PtrFLA13-R | AAGCGGGAAGTTCCGGTCTG    |
| <i>PtrFLA14/ Potri.009G012200</i>              | PtrFLA14-F | GCAGACTCCTCACAGGCACC    |
|                                                | PtrFLA14-R | GTCAGTGTATACAGTGCCTG    |
| <i>PtrFLA17/Potri.012G015000</i>               | PtrFLA17-F | TCCCAGACACCTACAGCAGC    |
|                                                | PtrFLA17-R | CCTGATAGATAGCAAGCTGGC   |
| <i>PtrFLA18/Potri.012G127900</i>               | PtrFLA18-F | CCACCTGGTCCAACCAATGT    |
|                                                | PtrFLA18-R | CACTGAGTTACCTGTGGTGG    |
| <i>PtrFLA19/ Potri.013G014200</i>              | PtrFLA19-F | CACAGGCAGCTCAACCACAC    |
|                                                | PtrFLA19-R | CTGGTATTGGTAAGTCCTG     |

|                                   |            |                       |
|-----------------------------------|------------|-----------------------|
| <i>PtrFLA20/ Potri.013G120600</i> | PtrFLA20-F | GCCACACTCATTCGCCTTCT  |
|                                   | PtrFLA20-R | CAGACACCATCTTGGCCTGA  |
| <i>PtrFLA21/Potri.013G151300</i>  | PtrFLA21-F | ATGCTTCTTCTTTCCCTGTG  |
|                                   | PtrFLA21-R | GATGGTTATACCAGTGTGG   |
| <i>PtrFLA22/Potri.013G151400</i>  | PtrFLA22-F | GTTTCTAGTAGAATAGCCTGG |
|                                   | PtrFLA22-R | GTCTGAAACTGGGAAGTGGAT |
| <i>PtrFLA23/Potri.013G151500</i>  | PtrFLA23-F | GCACAGGCACCAGCAGCAGT  |
|                                   | PtrFLA23-R | CTGGTGCAGGTGCTACCGGT  |
| <i>PtrFLA26/Potri.014G162900</i>  | PtrFLA26-F | CACCATCACCTCCTTACGTT  |
|                                   | PtrFLA26-R | GCTCACTTGGCTAAGGTTCT  |
| <i>PtrFLA28/Potri.015G013300</i>  | PtrFLA28-F | CCCAGCCACCAAATGCAGCA  |
|                                   | PtrFLA28-R | GGCCGAAAAGGCACCATCAG  |
| <i>PtrFLA29/Potri.015G129400</i>  | PtrFLA29-F | GCACCACCCGGTCCAACCAA  |
|                                   | PtrFLA29-R | GATAGTGCCGGATACGCTTG  |
| <i>PtrFLA31/Potri.016G088700</i>  | PtrFLA31-F | CGGCGATCCTTGCGAAAGCT  |
|                                   | PtrFLA31-R | AGTGTTTGCCACGGTTGCAG  |
| <i>PtrFLA38/ Potri.019G093300</i> | PtrFLA38-F | GGTGGTCAGTTCGTCACATTC |
|                                   | PtrFLA38-R | CAAACACCTTCTTGCCAGA   |
| <i>PtrFLA39/ Potri.019G120800</i> | PtrFLA39-F | CCAACGAAACCACTTGTCT   |
|                                   | PtrFLA39-R | GTACCTAGAGGGTTACTTACA |
| <i>PtrFLA40/Potri.019G120900</i>  | PtrFLA40-F | CCACCCAAGACGAAAACCGC  |
|                                   | PtrFLA40-R | TCTGGTGCAGATGCCACTGG  |
| <i>PtrFLA41/ Potri.019G121100</i> | PtrFLA41-F | GCGTTAAATGATTCAAGCACT |
|                                   | PtrFLA41-R | GCAACTATACCAACTGACCC  |
| <i>PtrFLA42/Potri.019G121200</i>  | PtrFLA42-F | CACCAACGTCACCATAATCC  |

|                                   |             |                           |
|-----------------------------------|-------------|---------------------------|
|                                   | PtrFLA42-R  | GTCCTTAGGGAGGAGTACCT      |
| <i>PtrFLA43/ Potri.019G121300</i> | PtrFLA43-F  | CGGCAGTAGTCGTAGCACCA      |
|                                   | PtrFLA43-R  | GCTTGAATCATTAGTGCGG       |
| <i>PtrFLA44/ Potri.019G122600</i> | PtrFLA44-F  | CTACTTCTCAGTTCCAGACC      |
|                                   | PtrFLA44-R  | CTCTCTACAGTTACAGCAGG      |
| <i>PtrFLA45/Potri.019G122800</i>  | PtrFLA45-F  | CTTTGCCCAGTCGCAAGCTG      |
|                                   | PtrFLA45-R  | GGCTAGTTGGTTGTCTGTGT      |
| <i>PtrFLA46/ Potri.019G123000</i> | PtrFLA46-F  | CTCTAGGTACATGGGCTGGAA     |
|                                   | PtrFLA46-R  | GCAACAACCTATACCAACTGATC   |
| <i>PtrFLA47/ Potri.019G123100</i> | PtrFLA47-F  | ACGTCACCAAAATCCTTGAG      |
|                                   | PtrFLA47-R  | TGTACTTAGGGAGGAGCACC      |
| <i>PtrFLA48/ Potri.019G123200</i> | PtrFLA48-F  | CGGCAGTAGTCGTAGCACCA      |
|                                   | PtrFLA48-R  | GCTTGAATCATTAGTGCGG       |
| <i>PtrActin2</i>                  | PtrActin2-F | AACATGGGATTGTTAGCAACTGG   |
|                                   | PtrActin2-R | TCCATCACCAGAATCCAGCACA    |
| Primers used for RT-PCR           |             |                           |
| <i>PtrCesA4/Potri.002G257900</i>  | PtrCesA4-F  | GAGTTAAGGAAGATGGAGAGGTGT  |
|                                   | PtrCesA4-R  | TGCACTGAGGACAGGACTGGTTGC  |
| <i>PtrCesA7A/Potri.006G181900</i> | PtrCesA7A-F | TCGCCTTTCTCTCAGATACGAACG  |
|                                   | PtrCesA7A-R | TTACCCGTAACAAGAGGGGGTTCC  |
| <i>PtrCesA7B/Potri.018G103900</i> | PtrCesA7B-F | CCCCTCTAGTCACGGGCAACACAC  |
|                                   | PtrCesA7B-R | AAGGTGCACATTGAAGCACCATCG  |
| <i>PtrCesA8A/Potri.011G069600</i> | PtrCesA8A-F | GTTGGCCTCTGTCTTCTCTTTGTC  |
|                                   | PtrCesA8A-R | CAATCTATAGAAATGCAGGTTTCAC |
| <i>PtrCesA8B/Potri.004G059600</i> | PtrCesA8B-F | GTTGGCCTCTGTCTTCTCTTTGTT  |

|                                     |               |                           |
|-------------------------------------|---------------|---------------------------|
|                                     | PtrCesA8B-R   | CAATCAATGGAAATGCAGGTCTCCG |
| <i>PtrPAL4/Potri.010G224100</i>     | PtrPAL4-F     | ACGTTGGTGTTCATGGTGGAG     |
|                                     | PtrPAL4-R     | GTGATAGCTTCCAGCATCTC      |
| <i>Ptr4CL3/Potri.001G036900</i>     | Ptr4CL3-F     | ACGTTGAGCTCACAGCAAGA      |
|                                     | Ptr4CL3-R     | ACGCACATGACCTTAACATC      |
| <i>PtrC3H3/Potri.006G033300</i>     | PtrC3H3-F     | AGTTGGGTGCATCACTTGCA      |
|                                     | PtrC3H3-R     | AACACTGTCCAACCTTTCCT      |
| <i>PtrCCoAOMT2/Potri.001G304800</i> | PtrCCoAOMT2-F | AGGAAGGCACCAGGAAGTTG      |
|                                     | PtrCCoAOMT2-R | GTGCGCAACACCAGCTTTCT      |
| <i>PtrF5H2/Potri.007G016400</i>     | PtrF5H2-F     | GAGAGATGAGGTGGACTCAA      |
|                                     | PtrF5H2-R     | GCATCTTCAGAGAAGTTATT      |
| <i>PtrCOMT2/Potri.012G006400</i>    | PtrCOMT2-F    | GATGCGCCTGTTCATGTTAGA     |
|                                     | PtrCOMT2-R    | TCCCTTATTGAAGACCTTGT      |
| <i>PtrEXPA1/Potri.001G240900</i>    | PtrEXPA1-F    | ATGTCATCGTTGTGGATGGC      |
|                                     | PtrEXPA1-R    | ACCATCTTGGGTCACTTGCA      |
| <i>PtrEXPA3/Potri.010G167200</i>    | PtrEXPA3-F    | GGAGGCTGGATTAATGCTCA      |
|                                     | PtrEXPA3-R    | AATTGGTGGCGGTGATCACA      |
| <i>PtrEXPA4/Potri.008G088300</i>    | PtrEXPA4-F    | GGTCTTGCTACGAGATTAGG      |
|                                     | PtrEXPA4-R    | ACAACACCAGCACTGTATCG      |
| <i>PtrEXPA5/Potri.009G031800</i>    | PtrEXPA5-F    | GTCATTGATGTGGAAGGGTG      |
|                                     | PtrEXPA5-R    | ACCATTGTGGGTCATCTGCG      |
| <i>PtrEXPA7/Potri.008G057100</i>    | PtrEXPA7-F    | GTACGGTAACTTGTACAGCC      |
|                                     | PtrEXPA7-R    | GGCGATCTTGAGGAACATAG      |
| <i>PtrEXPA16/Potri.006G086100</i>   | PtrEXPA16-F   | GGCAATCTGTATAGCCAAGG      |
|                                     | PtrEXPA16-R   | TCAAAGTGAGGACGAGGTGG      |

|                                    |              |                      |
|------------------------------------|--------------|----------------------|
| <i>PtrCYCD3;3/Potri.005G141900</i> | PtrCYCD3;3-F | CATTGGCTCTTGACGGGCTT |
|                                    | PtrCYCD3;3-R | TCAACTGCCTCTCTACGAAC |
