# Supplementary material for: Cas9/gRNA-Mediated Mutations in PtrFLA40 and PtrFLA45 Reveal Redundant Roles in Modulating Wood Cell Size and SCW Synthesis in Poplar
Source: MDPI journal article supplement (doi:10.3390/ijms24010427), 2022-12-27
Supplement: s1 [file s1]

**Table S4.** The Cas9/gRNA-targeted mutations in *PtrFLA40* and *PtrFLA45*.

| <b>Gene:</b> Potri.019G120900 ( <i>PtrFLA40</i> )                                                                                                                                                                                                                                                                     |                                                                                                          |                                                                                  |              |                                                         |                                                                                  |            |
|-----------------------------------------------------------------------------------------------------------------------------------------------------------------------------------------------------------------------------------------------------------------------------------------------------------------------|----------------------------------------------------------------------------------------------------------|----------------------------------------------------------------------------------|--------------|---------------------------------------------------------|----------------------------------------------------------------------------------|------------|
| <b>Vector:</b> Cas9/gRNA- <i>PtrFLA40</i><br><b>gRNA:</b> g <i>PtrFLA40</i> -T1 ( <u>CCC</u> AAGACGAAAACCGCTTATTC); g <i>PtrFLA40</i> -T2 (GATATATGTAGGGTTGTGTCC <u>CGG</u> )<br><b>Target sequences:</b> <i>PtrFLA40</i> -T1, <u>CCC</u> AAGACGAAAACCGCTTATTC; <i>PtrFLA40</i> -T2, GATATATGTAGGGTTGTGTCC <u>CGG</u> |                                                                                                          |                                                                                  |              |                                                         |                                                                                  |            |
| Line (#)                                                                                                                                                                                                                                                                                                              | <i>PtrFLA40</i> -T1<br><u>CCC</u> AAGACGAAAACCGCTTATTC                                                   | <b>Mutation types</b><br>(Number of plasmids containing the cloned PCR products) |              | <i>PtrFLA40</i> -T2<br>GATATATGTAGGGTTGTGTCC <u>CGG</u> | <b>Mutation types</b><br>(Number of plasmids containing the cloned PCR products) |            |
| <i>ptrfla40</i> -1#                                                                                                                                                                                                                                                                                                   | <u>CCC</u> AAGACGAAA-CCGCTTATTC<br><u>CCC</u> AAGA-GAAAACCGCTTATTC<br><u>CCC</u> AAGACGAAAACCGCTTATTC    | -1 (×8)<br>-1 (×7)<br>0 (×5)                                                     | chimera      | GATATATGTAGGGTTGTGTCC <u>CGG</u>                        | 0 (×20)                                                                          | WT         |
| <i>ptrfla40</i> -2#                                                                                                                                                                                                                                                                                                   | <u>CCC</u> AAGACGAAA-CCGCTTATTC                                                                          | -1 (×20)                                                                         | homozygous   | GATATATGTAGGGTTGTGTCC <u>CGG</u>                        | 0 (×20)                                                                          | WT         |
| <i>ptrfla40</i> -3#                                                                                                                                                                                                                                                                                                   | <u>CCC</u> AAGA(A)CGAAAACCGCTTATTC                                                                       | +1 (×20)                                                                         | homozygous   | GATATATGTAGGGTTGTGTCC <u>CGG</u>                        | 0 (×20)                                                                          | WT         |
| <i>ptrfla40</i> -4#                                                                                                                                                                                                                                                                                                   | <u>CCC</u> AAGACGAAA-CCGCTTATTC<br><u>CCC</u> AAG(T)ACGAAAACCGCTTATTC<br><u>CCC</u> AAGACGAAAACCGCTTATTC | -1 (×12)<br>+1 (×5)<br>0 (×3)                                                    | chimera      | GATATATGTAGGGTTGTGTCC <u>CGG</u>                        | 0 (×20)                                                                          | WT         |
| <i>ptrfla40</i> -5#                                                                                                                                                                                                                                                                                                   | <u>CCC</u> AAG(T)ACGAAAACCGCTTATTC<br><u>CCC</u> AAGACGAAAACCGCTTATTC                                    | +1 (×13)<br>0 (×7)                                                               | heterozygous | GATATATGTAGGGTTGTGTCC <u>CGG</u>                        | 0 (×20)                                                                          | WT         |
| <i>ptrfla40</i> -6#                                                                                                                                                                                                                                                                                                   | <u>CCC</u> AAGA(A)CGAAAACCGCTTATTC<br><u>CCC</u> AAGACGAAA-CCGCTTATTC                                    | +1 (×11)<br>-1 (×9)                                                              | biallelic    | GATATATGTAGGGTTGTGTCC <u>CGG</u>                        | 0 (×20)                                                                          | WT         |
| <b>Gene:</b> Potri.019G122800 ( <i>PtrFLA45</i> )                                                                                                                                                                                                                                                                     |                                                                                                          |                                                                                  |              |                                                         |                                                                                  |            |
| <b>Vector:</b> Cas9/gRNA- <i>PtrFLA45</i><br><b>gRNA:</b> g <i>PtrFLA45</i> -T1 ( <u>CCCT</u> TGGTTTAACCATCTTTGCAC); g <i>PtrFLA45</i> -T2 (GTCACAAAGTTATACAAACT <u>CGG</u> )<br><b>Target sequences:</b> <i>PtrFLA45</i> -T1, <u>CCCT</u> TGGTTTAACCATCTTTGCAC; <i>PtAP66</i> -4, GTCACAAAGTTATACAAACT <u>CGG</u>    |                                                                                                          |                                                                                  |              |                                                         |                                                                                  |            |
| Line (#)                                                                                                                                                                                                                                                                                                              | <i>PtrFLA45</i> -T1<br><u>CCCT</u> TGGTTTAACCATCTTTGCAC                                                  | <b>Mutation types</b><br>(Number of plasmids containing the cloned PCR products) |              | <i>PtrFLA45</i> -T2<br>GTCACAAAGTTATACAAACT <u>CGG</u>  | <b>Mutation types</b><br>(Number of plasmids containing the cloned PCR products) |            |
| <i>ptrfla45</i> -1#                                                                                                                                                                                                                                                                                                   | <u>CCCT</u> TGGT-----,.....                                                                              | -178 (×20)                                                                       | homozygous   | ----- ACT <u>CGG</u>                                    | -178 (×20)                                                                       | homozygous |

| <i>ptrfla45-2#</i>                                                                                                                                                                                                                                                                                                                                                                                                                     | <u>CCCT</u> ----AACCATCTTTGCAC                                                                                                | -5 (×20)                                                                         | homozygous   | GTCACAAAGTTATACAA-CT <u>CGG</u>                                                                                                  | -1 (×20)                                                                         | homozygous   |
|----------------------------------------------------------------------------------------------------------------------------------------------------------------------------------------------------------------------------------------------------------------------------------------------------------------------------------------------------------------------------------------------------------------------------------------|-------------------------------------------------------------------------------------------------------------------------------|----------------------------------------------------------------------------------|--------------|----------------------------------------------------------------------------------------------------------------------------------|----------------------------------------------------------------------------------|--------------|
| <i>ptrfla45-3#</i>                                                                                                                                                                                                                                                                                                                                                                                                                     | CCCTGG----CCATCTTTGCAC<br><u>CCCTGGTTTA</u> AACCATCTTTGCAC                                                                    | -5 (×13)<br>0 (×7)                                                               | heterozygous | GTCACAAAGTTATACAA-- <u>TGG</u><br>GTCACAAAGTTATACAAACT <u>CGG</u>                                                                | -2 (×9)<br>0 (×11)                                                               | heterozygous |
| <i>ptrfla45-4#</i>                                                                                                                                                                                                                                                                                                                                                                                                                     | <u>CCCTGGT</u> -----.....<br><u>CCCTGGTTTA</u> AACCATCTTTGCAC                                                                 | -178 (×14)<br>0 (×6)                                                             | heterozygous | .....-----ACT <u>CGG</u><br>GTCACAAAGTTATACAAACT <u>CGG</u>                                                                      | -178 (×14)<br>0 (×6)                                                             | heterozygous |
| <i>ptrfla45-5#</i>                                                                                                                                                                                                                                                                                                                                                                                                                     | <u>CCCTGG</u> -----.....<br><u>CCCTGGTTTA</u> AACCATCTTTGCAC                                                                  | -179 (×11)<br>0 (×9)                                                             | heterozygous | .....-----ACT <u>CGG</u><br>GTCACAAAGTTATACAAACT <u>CGG</u>                                                                      | -179 (×11)<br>0 (×9)                                                             | heterozygous |
| <i>ptrfla45-6#</i>                                                                                                                                                                                                                                                                                                                                                                                                                     | <u>CCCTGGTTT</u> -----GCAC                                                                                                    | -10 (×20)                                                                        | homozygous   | GTCACAAAGTTATACAAACT <u>CGG</u>                                                                                                  | 0 (×20)                                                                          | homozygous   |
| <i>ptrfla45-7#</i>                                                                                                                                                                                                                                                                                                                                                                                                                     | <u>CCCTGGT</u> -----.....<br><u>CCCTGG</u> -----.....<br><u>CCCTGGTTTA</u> AACCATCTTTGCAC                                     | -178 (×9)<br>-179 (×7)<br>0 (×4)                                                 | chimera      | .....-----ACT <u>CGG</u><br>.....-----ACT <u>CGG</u><br>GTCACAAAGTTATACAAACT <u>CGG</u>                                          | -178 (×9)<br>-179 (×7)<br>0 (×4)                                                 | chimera      |
| <b>Vector:</b> Cas9/gRNA- <i>PtrFLA40/45</i><br><b>gRNA:</b> g <i>PtrFLA40/45-T1</i> ( <u>CCA</u> TTGTCCCAATACCTTTGCC); g <i>PtrFLA40/45-T2</i> (GCGCTAAATGACTCAAGCCC <u>TGG</u> )<br><b>Target sequences:</b> <i>PtrFLA40-T1</i> , <u>CCA</u> TTGTCCCAATACCTTTGCC; <i>PtrFLA40-T2</i> , GCGCTAAATGACTCAAGCACT <u>TGG</u><br><i>PtrFLA45-T1</i> , <u>CCA</u> TTGTCCCAATACCTTTGCC; <i>PtrFLA45-T2</i> , GCGCTAAATGACTCAAGCCC <u>TGG</u> |                                                                                                                               |                                                                                  |              |                                                                                                                                  |                                                                                  |              |
| Line (#)                                                                                                                                                                                                                                                                                                                                                                                                                               | <i>PtrFLA40/45-T1</i><br><i>PtrFLA40</i> , <u>CCA</u> TTGTCCCAATACCTTTGCC<br><i>PtrFLA45</i> , <u>CCA</u> TTGTCCCAATACCTTTGCC | <b>Mutation types</b><br>(Number of plasmids containing the cloned PCR products) |              | <i>PtrFLA40/45-T2</i><br><i>PtrFLA40</i> , GCGCTAAATGACTCAAGCACT <u>TGG</u><br><i>PtrFLA45</i> , GCGCTAAATGACTCAAGCCC <u>TGG</u> | <b>Mutation types</b><br>(Number of plasmids containing the cloned PCR products) |              |
| <i>ptrfla40/45-1#-fla40</i>                                                                                                                                                                                                                                                                                                                                                                                                            | <u>CCA</u> TT(A)GTCCCAATACCTTTGCC<br>-----TGCCC                                                                               | +1 (×15)<br>-18 (×5)                                                             | biallelic    | GCGCTAAATGACTCAAGCACT <u>TGG</u>                                                                                                 | 0 (×20)                                                                          | WT           |
| - <i>fla45</i>                                                                                                                                                                                                                                                                                                                                                                                                                         | <u>CCA</u> -----.....                                                                                                         | -222 (×20)                                                                       | homozygous   | .....-----CCCTGG                                                                                                                 | -222 (×20)                                                                       | homozygous   |
| <i>ptrfla40/45-2#-fla40</i>                                                                                                                                                                                                                                                                                                                                                                                                            | <u>CCAT</u> -GTCCCAATACCTTTGCC                                                                                                | -1 (×20)                                                                         | homozygous   | GCGCTAAATGACTCAAGCACT <u>TGG</u>                                                                                                 | 0 (×20)                                                                          | WT           |
| - <i>fla45</i>                                                                                                                                                                                                                                                                                                                                                                                                                         | <u>CCAT</u> -GTCCCAATACCTTTGCC                                                                                                | -1 (×20)                                                                         | homozygous   | GCGCTAAATGACTCAAG(A)CCCT <u>TGG</u>                                                                                              | +1 (×20)                                                                         | homozygous   |
| <i>ptrfla40/45-3#-fla40</i>                                                                                                                                                                                                                                                                                                                                                                                                            | <u>CCAT</u> -GTCCCAATACCTTTGCC<br><u>CCA</u> TTGTCCCAATACCTTTGCC                                                              | -1 (×14)<br>0 (×6)                                                               | heterozygous | GCGCTAAATGACTCAAGCACT <u>TGG</u>                                                                                                 | 0 (×20)                                                                          | WT           |
| - <i>fla45</i>                                                                                                                                                                                                                                                                                                                                                                                                                         | <u>CCAT</u> -GTCCCAATACCTTTGCC<br>-----TACCAATACCTTTGCC                                                                       | -1 (×12)<br>-7 (×8)                                                              | biallelic    | ----- <u>TGG</u><br>GCGCTAAATGACTCAAGCCC <u>TGG</u>                                                                              | -20 (×12)<br>0 (×8)                                                              | heterozygous |
| <i>ptrfla40/45-4#-fla40</i>                                                                                                                                                                                                                                                                                                                                                                                                            | <u>C</u> -----TACCAATACCTTTGCC<br><u>CCA</u> --GTCCCAATACCTTTGCC<br><u>CCA</u> TTGTACCAATACCTTTGCC                            | -5 (×8)<br>-2 (×3)<br>0 (×9)                                                     | chimera      | GCGCTAAATGACTCAAGCACT <u>TGG</u>                                                                                                 | 0 (×20)                                                                          | WT           |
| - <i>fla45</i>                                                                                                                                                                                                                                                                                                                                                                                                                         | <u>CCAT</u> -GTCCCAATACCTTTGCC                                                                                                | -1 (×20)                                                                         | homozygous   | ----- <u>TGG</u>                                                                                                                 | -20 (×20)                                                                        | homozygous   |

|                                              |                                 |            |              |                                              |           |              |
|----------------------------------------------|---------------------------------|------------|--------------|----------------------------------------------|-----------|--------------|
| <i>ptrfla40/45-5#-fla40</i><br><i>-fla45</i> | <u>C</u> ----TCCCAATACCTTTGCCC  | -5 (×20)   | homozygous   | GCGCTAAATGACTCAAGCACT <u>TGG</u>             | 0 (×20)   | WT           |
|                                              | <u>C</u> --TTGTCCCAATACCTTTGCCC | -2 (×20)   | homozygous   | GCGCTAAATGAC----CCCT <u>TGG</u>              | -5 (×20)  | homozygous   |
| <i>ptrfla40/45-6#-fla40</i><br><i>-fla45</i> | <u>CCAT</u> -GTCCCAATACCTTTGCCC | -1 (×11)   | heterozygous | GCGCTAAATGACTCAAGCACT <u>TGG</u>             | 0 (×20)   | WT           |
|                                              | <u>CCATT</u> GTCCCAATACCTTTGCCC | 0 (×9)     |              |                                              |           |              |
|                                              | <u>CCAT</u> -GTCCCAATACCTTTGCCC | -1 (×4)    | chimera      | GCGCTAAATGACTCAAG( <u>G</u> )CCCT <u>TGG</u> | +1 (×8)   | heterozygous |
|                                              | -----TACCAATACCTTTGCCC          | -7 (×7)    |              | GCGCTAAATGACTCAAGCCCT <u>TGG</u>             | 0 (×12)   |              |
|                                              | <u>CCATT</u> GTACCAATACCTTTGCCC | 0 (×9)     |              |                                              |           |              |
| <i>ptrfla40/45-7#-fla40</i><br><i>-fla45</i> | .....-----                      | -254 (×20) | homozygous   | GCGCTAAATGACTCAAGCACT <u>TGG</u>             | 0 (×20)   | homozygous   |
|                                              | <u>C</u> --TTGTCCCAATACCTTTGCCC | -2 (×2)    | chimera      | GCGCTAAATGAC----CCCT <u>TGG</u>              | -5 (×2)   | chimera      |
|                                              | <u>CCAT</u> -GTCCCAATACCTTTGCCC | -1 (×5)    |              | ----- <u>TGG</u>                             | -20 (×5)  |              |
|                                              | -----TACCAATACCTTTGCCC          | -7 (×7)    |              | GCGCTAAATGACTCAAGCCCT <u>TGG</u>             | 0 (×7)    |              |
|                                              | .....-----                      | -254 (×6)  |              | .....-----                                   | -254 (×6) |              |
| <i>ptrfla40/45-8#-fla40</i><br><i>-fla45</i> | .....-----                      | -254 (×20) | homozygous   | GCGCTAAATGACTCAAGCACT <u>TGG</u>             | 0 (×20)   | homozygous   |
|                                              | <u>CCAT</u> -GTCCCAATACCTTTGCCC | -1 (×15)   | biallelic    | .....-----CT <u>TGG</u>                      | -191 (×1) | chimera      |
|                                              | -----TACCAATACCTTTGCCC          | -7 (×5)    |              | ----- <u>TGG</u>                             | -20 (×14) |              |
|                                              |                                 |            |              | GCGCTAAATGACTCAAGCCCT <u>TGG</u>             | 0 (×5)    |              |
| <i>ptrfla40/45-9#-fla40</i><br><i>-fla45</i> | <u>CCA</u> --GTCCCAATACCTTTGCCC | -2 (×20)   | homozygous   | GCGCTAAATGACTCAAGCACT <u>TGG</u>             | 0 (×20)   | WT           |
|                                              | <u>CCAT</u> -GTCCCAATACCTTTGCCC | -1 (×18)   | biallelic    | ----- <u>TGG</u>                             | -20 (×18) | heterozygous |
|                                              | -----TACCAATACCTTTGCCC          | -7 (×2)    |              | GCGCTAAATGACTCAAGCCCT <u>TGG</u>             | 0 (×2)    |              |
