# Supplementary material for: Cas9/gRNA-Mediated Mutations in PtrFLA40 and PtrFLA45 Reveal Redundant Roles in Modulating Wood Cell Size and SCW Synthesis in Poplar
Source: Int J Mol Sci. 2022 Dec 27;24(1):427. doi: 10.3390/ijms24010427 (PMC9820481; doi:10.3390/ijms24010427)
Supplement: Supplementary file 1 [file ijms-24-00427-s001.zip]

Archive with 5 entries (5 files):
- Figures S1-S4.pdf
- Table S1.xlsx
- Table S2.xlsx
- Table S3.pdf
- Table S4.pdf
