# Supplementary material for: Cas9/gRNA-Mediated Mutations in PtrFLA40 and PtrFLA45 Reveal Redundant Roles in Modulating Wood Cell Size and SCW Synthesis in Poplar
Source: Int J Mol Sci. 2022 Dec 27;24(1):427. doi: 10.3390/ijms24010427 (PMC9820481; doi:10.3390/ijms24010427)
Supplement: Supplementary file 1 [file ijms-24-00427-s001.zip › Table S1.xlsx]

## Sheet: Table S1
Table S1. Fasciclin-like arabinogalactan protein genes (FLAs) in Populus trichocarpa.
Gene name	Gene locus	Group	Protein length (aa)	Number of putative glycosylated regions				FAS-like domain	Signal Peptide	GPI anchor	Localization
				[A/S/T]-P	[A/S/T]-P-P	[A/S/T]-P-P-P	([A/S/T]-P-X(0-10)-[A/S/T]-P)X
PtrFLA1	Potri.001G037800	C	281	9	1	0	2	1	Yes	Yes	Cell membrane. Cell wall.
PtrFLA2	Potri.001G320800	A	243	8	1	0	2	1	Yes	Yes	Cell membrane.
PtrFLA3	Potri.001G367900	C	406	11	0	0	3	1	Yes	Yes	Cell membrane.
PtrFLA4	Potri.001G440800	D	399	29	2	0	3	1	Yes	Yes	Cell membrane. Nucleus.
PtrFLA5	Potri.002G223300	A	263	12	3	0	2	1	Yes	Yes	Cell membrane.
PtrFLA6	Potri.004G210600	A	268	14	1	0	2	1	Yes	No	Cell membrane.
PtrFLA7	Potri.005G079500	D	442	5	1	0	1	2	Yes	No	Cell membrane.
PtrFLA8	Potri.006G129200	A	239	7	0	0	2	1	Yes	Yes	Cell membrane.
PtrFLA9	Potri.006G174900	C	426	4	0	0	1	2	Yes	Yes	Cell membrane.
PtrFLA10	Potri.006G200300	B	466	5	1	0	1	2	Yes	No	Cell membrane. Chloroplast.
PtrFLA11	Potri.006G276200	C	393	14	2	1	2	1	No	Yes	Cell membrane. Nucleus.
PtrFLA12	Potri.008G012400	B	463	6	1	0	1	2	Yes	No	Cell membrane.
PtrFLA13	Potri.009G012100	A	263	6	1	0	2	1	Yes	No	Cell membrane.
PtrFLA14	Potri.009G012200	A	269	11	2	0	2	1	Yes	No	Cell membrane.
PtrFLA15	Potri.010G244900	B	459	6	1	0	1	2	Yes	No	Cell membrane.
PtrFLA16	Potri.011G093500	C	408	10	0	0	3	2	Yes	Yes	Cell membrane.
PtrFLA17	Potri.012G015000	A	269	7	2	1	2	1	Yes	Yes	Cell membrane.
PtrFLA18	Potri.012G127900	A	240	8	0	0	3	1	Yes	Yes	Cell membrane.
PtrFLA19	Potri.013G014200	A	266	11	0	0	3	1	Yes	Yes	Cell membrane.
PtrFLA20	Potri.013G120600	A	238	5	1	0	1	1	Yes	Yes	Cell membrane.
PtrFLA21	Potri.013G151300	A	269	11	0	0	3	1	Yes	Yes	Cell membrane.
PtrFLA22	Potri.013G151400	A	269	11	0	0	3	1	Yes	Yes	Cell membrane.
PtrFLA23	Potri.013G151500	A	264	11	0	0	3	1	Yes	No	Cell membrane.
PtrFLA24	Potri.013G152200	D	353	4	0	0	1	2	Yes	No	Cell membrane.
PtrFLA25	Potri.014G071700	C	421	19	2	0	2	1	Yes	Yes	Cell membrane.
PtrFLA26	Potri.014G162900	A	262	13	3	0	2	1	Yes	Yes	Cell membrane.
PtrFLA27	Potri.014G168100	C	397	7	0	0	2	1	Yes	Yes	Cell membrane.
PtrFLA28	Potri.015G013300	A	267	6	2	0	2	1	Yes	Yes	Cell membrane.
PtrFLA29	Potri.015G129400	A	240	8	1	0	3	1	Yes	Yes	Cell membrane.
PtrFLA30	Potri.016G066500	B	466	6	1	0	1	2	Yes	No	Cell membrane. Chloroplast.
PtrFLA31	Potri.016G088700	A	239	8	0	0	2	1	Yes	Yes	Cell membrane.
PtrFLA32	Potri.017G111600	D	352	7	0	0	1	2	Yes	No	Cell membrane.
PtrFLA33	Potri.018G005100	C	271	9	0	1	2	1	Yes	Yes	Cell membrane. Nucleus.
PtrFLA34	Potri.018G097000	C	427	3	0	0	1	2	Yes	No	Cell membrane.
PtrFLA35	Potri.019G002300	D	283	2	0	0	1	1	Yes	No	Cell membrane.
PtrFLA36	Potri.019G008400	B	361	8	0	0	1	1	No	No	Cell membrane.
PtrFLA37	Potri.019G049600	D	252	5	1	1	1	1	Yes	No	Cell membrane.
PtrFLA38	Potri.019G093300	A	245	6	1	0	1	1	Yes	Yes	Cell membrane.
PtrFLA39	Potri.019G120800	A	214	12	0	0	3	1	No	No	Cell membrane.
PtrFLA40	Potri.019G120900	A	227	10	1	0	2	1	Yes	Yes	Cell membrane.
PtrFLA41	Potri.019G121100	A	262	12	0	0	3	1	Yes	No	Cell membrane.
PtrFLA42	Potri.019G121200	A	263	10	1	0	2	1	Yes	Yes	Cell membrane.
PtrFLA43	Potri.019G121300	A	263	10	0	1	2	1	Yes	Yes	Cell membrane.
PtrFLA44	Potri.019G122600	A	215	7	0	0	2	1	No	No	Cell membrane.
PtrFLA45	Potri.019G122800	A	252	10	1	0	2	1	Yes	Yes	Cell membrane.
PtrFLA46	Potri.019G123000	A	269	12	0	1	3	1	Yes	Yes	Cell membrane.
PtrFLA47	Potri.019G123100	A	263	10	1	0	2	1	Yes	Yes	Cell membrane.
PtrFLA48	Potri.019G123200	A	263	10	0	1	2	1	Yes	Yes	Cell membrane.
PtrFLA49	Potri.T118500	D	210	2	1	0	1	1	No	Yes	Cell membrane.
PtrFLA50	Potri.T130300	C	271	9	0	1	2	1	Yes	Yes	Cell membrane. Nucleus.
