# Supplementary material for: Cas9/gRNA-Mediated Mutations in PtrFLA40 and PtrFLA45 Reveal Redundant Roles in Modulating Wood Cell Size and SCW Synthesis in Poplar
Source: Int J Mol Sci. 2022 Dec 27;24(1):427. doi: 10.3390/ijms24010427 (PMC9820481; doi:10.3390/ijms24010427)
Supplement: Supplementary file 1 [file ijms-24-00427-s001.zip › Table S2.xlsx]

## Sheet: Table S2
Table S2. The eFP values of 34 PtrFLAs downloaded from the Poplar eFP browser
Gene symbol	Gene locus	Group	Mature Leaf	Young Leaf	Root	Xylem	Female Catkins	Male Catkins
PtrFLA1	Potri.001G037800	C	17.71	97.97	24	57.47	64023.6	108401
PtrFLA2	Potri.001G320800	A	20.2	87.43	649.8	27288.8	392.57	244.37
PtrFLA3	Potri.001G367900	C	1477.22	9548.5	5420.4	4171.53	2704.83	1945.13
PtrFLA4	Potri.001G440800	D	3.61	10.97	44.23	58.77	44.5	114.07
PtrFLA5	Potri.002G223300	A	49.28	736.23	532.9	17557.7	215	163.07
PtrFLA6	Potri.004G210600	A	5.16	55.67	28.33	4729.63	48.27	78.87
PtrFLA7	Potri.005G079500	D	9.04	41.1	37.67	16.2	43	74.8
PtrFLA9	Potri.006G174900	C	136.91	530.3	339.67	1858.93	273.17	270.43
PtrFLA11	Potri.006G276200	C	11.08	25.83	14.9	20.37	86084.7	129817
PtrFLA12	Potri.008G012400	B	17.11	31.87	34.23	4554.73	39.1	82.53
PtrFLA13	Potri.009G012100	A	378.67	282.37	33.47	29973.5	34.03	25.93
PtrFLA17	Potri.012G015000	A	19.79	30.3	17.03	22849.4	33.23	29.7
PtrFLA18	Potri.012G127900	A	29.21	157.57	366.57	18569.4	120.7	112.63
PtrFLA20	Potri.013G120600	A	116.06	266.4	1112.77	596.53	1072.97	651.8
PtrFLA21	Potri.013G151300	A	7.98	22	33.07	84242.6	45.1	86.53
PtrFLA22	Potri.013G151400	A	2.38	19.03	5.93	24099.5	93.93	58.67
PtrFLA23	Potri.013G151500	A	163.02	555.33	682.2	72552.1	541.7	993.03
PtrFLA24	Potri.013G152200	D	1.17	11.13	6.47	33.4	56.93	17.3
PtrFLA25	Potri.014G071700	C	1962.83	15004.7	4295.47	28959.8	240.87	184.27
PtrFLA26	Potri.014G162900	A	164.01	2028.5	3520.13	21111.2	3814.87	1045.83
PtrFLA27	Potri.014G168100	C	57.52	53	1251.6	154.23	101.73	93.8
PtrFLA28	Potri.015G013300	A	4.59	20.8	17.07	62038.6	43.87	32.93
PtrFLA29	Potri.015G129400	A	14.82	22.37	152.83	20710.5	31.67	24.87
PtrFLA30	Potri.016G066500	B	91.68	170.9	147.63	126.93	152.63	245.27
PtrFLA31	Potri.016G088700	A	123.48	263.83	468.33	29442	33.8	106.43
PtrFLA32	Potri.017G111600	D	51.98	106.1	42.43	68.83	120.33	289
PtrFLA34	Potri.018G097000	C	70.76	102.97	55.67	228.8	77.57	31.57
PtrFLA35	Potri.019G002300	D	20.74	118.3	71.8	10.1	128.1	69.47
PtrFLA36	Potri.019G008400	B	12.23	91.57	161.4	920.17	95.9	185
PtrFLA37	Potri.019G049600	D	14.87	142.83	47.2	131.63	59.87	209.57
PtrFLA38	Potri.019G093300	A	597.85	1657.3	3280.67	287.33	6954.63	3286.27
PtrFLA40	Potri.019G120900	A	9.56	82.43	56.27	33939.6	65.13	93
PtrFLA42	Potri.019G121200	A	9.56	82.43	56.27	33939.6	65.13	93
PtrFLA45	Potri.019G122800	A	9.56	82.43	56.27	33939.6	65.13	93
